# Supplementary material for: Relative and Absolute Risk of Tendon Rupture with Fluoroquinolone and Concomitant Fluoroquinolone/Corticosteroid Therapy: Population-Based Nested Case–Control Study
Source: Springer Nature journal article supplement (doi:10.1007/s40261-018-0729-y), 2018-11-21
Supplement: MOESM1 [file 24113358]

## CLINICAL DRUG INVESTIGATION

### **Relative and absolute risk of tendon rupture with fluoroquinolone and concomitant fluoroquinolone/corticosteroid therapy: population-based nested case-control study**

**Daniel Morales**, Division of Population Health & Genomics, School of Medicine, University of Dundee, UK

**Jim Slattery**, Pharmacovigilance and Epidemiology Department, European Medicines Agency, London, UK

**Alexandra Pacurariu**, Pharmacovigilance and Epidemiology Department, European Medicines Agency, London, UK

**Luis Pinheiro**, Pharmacovigilance and Epidemiology Department, European Medicines Agency, London, UK

**Patricia McGettigan**, Pharmacovigilance and Epidemiology Department, European Medicines Agency, London, UK

**Xavier Kurz**, Pharmacovigilance and Epidemiology Department, European Medicines Agency, London, UK

## **SUPPLEMENTARY MATERIAL**

## CLINICAL DRUG INVESTIGATION

**Supplementary table S1. Read codes to identify tendon ruptures diagnoses in THIN.**

| Read code | Description                                              |
|-----------|----------------------------------------------------------|
| Nyu9200   | [X]Spontaneous rupture of other tendons                  |
| N226200   | Biceps tendon rupture                                    |
| S922000   | Complete division extensor tendon hand                   |
| S912300   | Complete division extensor tendon wrist                  |
| S922100   | Complete division flexor tendon hand                     |
| S912400   | Complete division flexor tendon wrist                    |
| S902500   | Complete division, biceps tendon                         |
| S932200   | Complete division, both flexor tendons                   |
| S932300   | Complete division, extensor digitorum tendon             |
| S932600   | Complete division, extensor pollicis longus tendon       |
| SA22100   | Complete division, extensor tendon, foot                 |
| S932100   | Complete division, flexor digitorum profundus tendon     |
| S932000   | Complete division, flexor digitorum superficialis tendon |
| S932500   | Complete division, flexor pollicis longus tendon         |
| SA22000   | Complete division, flexor tendon, foot                   |
| SA02300   | Complete division, hamstring tendon                      |
| S902400   | Complete division, long head of biceps tendon            |
| SA12300   | Complete division, patellar tendon                       |
| SA02200   | Complete division, quadriceps tendon                     |
| SA12400   | Complete division, tendocalcaneus (Achilles tendon)      |
| S902600   | Complete division, triceps tendon                        |
| N226D00   | Flexor digitorum profundus tendon rupture                |
| N226C00   | Flexor digitorum sublimis tendon rupture                 |
| N226E00   | Flexor pollicis longus tendon rupture                    |
| N226300   | Hand and wrist extensor tendon rupture                   |
| N226400   | Hand and wrist flexor tendon rupture                     |
| N226700   | Nontraumatic rupture of Achilles tendon                  |
| N226600   | Nontraumatic rupture of patellar tendon                  |
| N226.12   | Nontraumatic tendon dislocation                          |
| N226.00   | Nontraumatic tendon rupture                              |
| N226000   | Nontraumatic tendon rupture, unspecified                 |
| N226y00   | Other foot and ankle tendon rupture                      |
| N226z00   | Other nontraumatic tendon rupture                        |
| S5W..00   | Other specified tendon rupture                           |
| S932A00   | Partial division both flexor tendons                     |
| S922200   | Partial division extensor tendon hand                    |
| S912500   | Partial division extensor tendon wrist                   |
| S922300   | Partial division flexor tendon hand                      |
| S912600   | Partial division flexor tendon wrist                     |
| S902800   | Partial division, biceps tendon                          |
| S932B00   | Partial division, extensor digitorum tendon              |
| S932D00   | Partial division, extensor pollicis longus tendon        |

## CLINICAL DRUG INVESTIGATION

|         |                                                         |
|---------|---------------------------------------------------------|
| SA22300 | Partial division, extensor tendon of foot               |
| S932900 | Partial division, flexor digitorum profundus tendon     |
| S932800 | Partial division, flexor digitorum superficialis tendon |
| S932C00 | Partial division, flexor pollicis longus tendon         |
| SA22200 | Partial division, flexor tendon of foot                 |
| SA02500 | Partial division, hamstring tendon                      |
| S902700 | Partial division, long head of biceps tendon            |
| SA12500 | Partial division, patellar tendon                       |
| SA02400 | Partial division, quadriceps tendon                     |
| SA12600 | Partial division, tendocalcaneus (Achilles tendon)      |
| S902900 | Partial division, triceps tendon                        |
| N226500 | Quadriceps tendon rupture                               |
| S5V0.00 | Rupture Achilles tendon                                 |
| S5Q4.00 | Rupture biceps tendon                                   |
| S5T2.00 | Rupture extensor digitorum tendon                       |
| S5T1.00 | Rupture flexor digitorum profundus tendon               |
| S5T0.00 | Rupture flexor digitorum superficialis tendon           |
| S5V3.00 | Rupture foot extensor tendon                            |
| S5V2.00 | Rupture foot flexor tendon                              |
| S5U1.00 | Rupture hamstring tendon                                |
| S5Q0.00 | Rupture infraspinatus tendon                            |
| S5Q3.00 | Rupture long head biceps tendon                         |
| S5U2.00 | Rupture patellar tendon                                 |
| S5V1.00 | Rupture plantaris tendon                                |
| S5U0.00 | Rupture quadriceps tendon                               |
| S5Q1.00 | Rupture subscapularis tendon                            |
| S5Q2.00 | Rupture supraspinatus tendon                            |
| S5R..00 | Rupture tendon forearm or wrist                         |
| S5Rz.00 | Rupture tendon hand or wrist NOS                        |
| S5V..00 | Rupture tendon leg or foot                              |
| S5Vz.00 | Rupture tendon leg or foot NOS                          |
| S5T..00 | Rupture tendon of finger                                |
| S5Tz.00 | Rupture tendon of finger NOS                            |
| S5S..00 | Rupture tendon of thumb                                 |
| S5U..00 | Rupture tendon thigh                                    |
| S5Sz.00 | Rupture tendon thumb NOS                                |
| S5Q..00 | Rupture tendon upper arm                                |
| S5Qz.00 | Rupture tendon upper arm NOS                            |
| S5Q5.00 | Rupture triceps tendon                                  |
| S5Uz.00 | Rupture upper leg tendon NOS                            |
| S550411 | Ruptured Achilles tendon - traumatic                    |
| N226N00 | Spontaneous rupture of extensor tendons                 |
| N226M00 | Spontaneous rupture of flexor tendons                   |
| S5z..15 | Tendon rupture NOS                                      |
| S550412 | Torn Achilles tendon                                    |
| S50x.11 | Traumatic rupture of biceps tendon                      |

## CLINICAL DRUG INVESTIGATION

**Supplementary table S2. Incident rate ratios for the association between any tendon rupture and cumulative systemic fluoroquinolone and co-amoxiclav exposure within the current exposure risk window.**

|                                    | <b>Crude<br/>IRR</b> | <b>Adjusted<br/>IRR</b> | <b>Adjusted<br/>p-value</b> |
|------------------------------------|----------------------|-------------------------|-----------------------------|
| <i>Any tendon rupture</i>          |                      |                         |                             |
| ▪ Days of fluoroquinolone exposure | 1.00 (0.999-1.001)   | 1.03 (1.01-1.05)        | 0.001                       |
| ▪ Days of co-amoxiclav exposure    | 1.00 (0.998-1.002)   | 0.99 (0.97-1.02)        | 0.551                       |
| <i>Achilles tendon rupture</i>     |                      |                         |                             |
| ▪ Days of fluoroquinolone exposure | 1.00 (0.999-1.001)   | 1.06 (1.03-1.09)        | <0.001                      |
| ▪ Days of co-amoxiclav exposure    | 1.02 (0.98-1.06)     | 0.99 (0.94-1.04)        | 0.653                       |

Total number of days exposure measured on a continuous scale. Adjusted for exact age, body mass index, Charlson comorbidity score, hypothyroidism, hyperthyroidism, smoking status, oral and injectable corticosteroid exposure, and prior history of tendon rupture. IRR = Incidence rate ratio.

## CLINICAL DRUG INVESTIGATION

**Supplementary table S3. Sensitivity analyses for the association between tendon rupture and current systemic fluoroquinolone and current co-amoxiclav exposure.**

| Sensitivity analysis                        | Fluoroquinolone<br>aIRR (95%CI) | Co-amoxiclav<br>aIRR (95%CI) |
|---------------------------------------------|---------------------------------|------------------------------|
| <i><u>Any tendon rupture</u></i>            |                                 |                              |
| Risk window using 60 days                   | 1.45 (1.19-1.78)                | 1.09 (0.90-1.33)             |
| Risk window using 90 days                   | 1.19 (0.99-1.41)                | 1.05 (0.88-1.16)             |
| Modelling individual Charlson comorbidities | 1.63 (1.26-2.10)                | 1.02 (0.79-1.31)             |
| Excluding traumatic tendon ruptures         | 1.63 (1.26-2.11)                | 1.02 (0.79-1.31)             |
| Excluding people with prior tendon rupture  | 1.64 (1.27-2.12)                | 0.99 (0.76-1.27)             |
| Complete case analysis                      | 1.63 (1.23-2.16)                | 1.03 (0.79-1.34)             |
| <i><u>Achilles tendon rupture</u></i>       |                                 |                              |
| Risk window using 60 days                   | 2.95 (2.12-4.11)                | 1.16 (0.82-1.64)             |
| Risk window using 90 days                   | 2.21 (1.65-2.96)                | 1.12 (0.84-1.51)             |
| Modelling individual Charlson comorbidities | 3.16 (2.11-4.74)                | 1.01 (0.64-1.59)             |
| Excluding traumatic tendon ruptures         | 3.14 (2.11-4.66)                | 1.00 (0.64-1.57)             |
| Excluding people with prior tendon rupture  | 3.08 (2.07-4.57)                | 0.97 (0.62-1.53)             |
| Complete case analysis                      | 3.28 (2.13-5.06)                | 1.02 (0.64-1.63)             |

Adjusted for exact age, gender body mass index, Charlson comorbidity score, hypothyroidism, hyperthyroidism, smoking status, oral and injectable corticosteroid exposure, statin therapy and prior history of tendon rupture. IRR = Incidence rate ratio.
